# Supplementary material for: Genetic Studies of Hypertrophic Cardiomyopathy in Singaporeans Identify Variants in TNNI3 and TNNT2 That Are Common in Chinese Patients
Source: PubMed Central journal article supplement (PMC7676617; doi:10.1161/circgen.119.002823), 2020-08-20
Supplement: hcg-13-424-s001.pdf [file hcg-13-424-s001.pdf]

## **SUPPLEMENTAL MATERIAL**

### **ADDITIONAL METHODS**

#### *Subjects*

Prospective unrelated patients with a diagnosis of HCM (n=224) as confirmed by cardiac magnetic resonance imaging (MRI) and/or echocardiographic diagnostic criteria were recruited from National Heart Centre Singapore (NHCS) (n=159) and National University Hospital Singapore (n=65). Singaporean controls (n=3,634) comprising of 1,000 unrelated individuals without cardiovascular diseases (CVD) or family history of CVD recruited at NHCS via advertisement and 2,634 aggregated genomes of self-reported healthy individuals from Singapore Exome Consortium (SEC)<sup>1</sup> were collected. Clinically annotated genetic data from 6,179 additional HCM cases, predominantly Caucasian, referred to the Oxford Molecular Genetics Laboratory (OMGL) or the Partners Laboratory for Molecular Medicine (LMM) were retrieved from Atlas of Cardiac Genetic Variation (ACGV) dataset<sup>2-4</sup>. All Singaporean participants gave written informed consent to participate in this ethics board approved study, which was carried out in accordance with local Tissue Acts.

#### *Sequencing and variant classification of prospective hypertrophic cardiomyopathy patients*

Genetic evaluation of variation in established HCM-associated genes was performed using targeted re-sequencing in all 224 index Singaporean HCM patients as previously described<sup>5</sup>. Variants of 15 genes<sup>6</sup> either robustly associated with HCM, or well-validated pheno/genocopies

(*ACTC1*, *CSRP3*, *FHL1*, *GLA*, *LAMP2*, *MYBPC3*, *MYH7*, *MYL2*, *MYL3*, *PLN*, *PRKAG2*, *TNNC1*, *TNNI3*, *TNNT2*, *TPM1*) were annotated using CardioClassifier, an inherited cardiac condition-specific decision-support tool<sup>7</sup>. Genome sequencing (GS) was performed in an additional 1,000 unrelated controls using the TruSeq DNA Nano kit (Illumina, California, US) according to manufacturer's instructions. The Illumina HiSeq X Ten system was then used to perform GS (2 X 150 bp) to a mean genome-wide read depth of 20X with at least 80% of bases covered >20X. The AF of *TNNI3*:p.R79C (ENST00000344887:c.235C>T) and *TNNT2*:p.R286H (ENST00000367318:c.857G>A) in Singaporean reference controls (n=3,634) were retrieved from the combined GS data and the aggregated genomes from SEC.

### ***Population reference data***

Genome Aggregation Database (gnomAD) is a reference population dataset comprising 125,748 exomes and 15,708 genomes from unrelated individuals from 8 major populations including East Asian and Caucasian<sup>8</sup>. Data were downloaded from gnomAD website (<http://gnomad.broadinstitute.org>, Oct 2018) [version 2.1, Oct 2018] containing information about the sub-continental populations in Europe and East Asia. In addition, allele frequencies of *TNNI3*:p.R79C and *TNNT2*:p.R286H were retrieved from Taiwan Biobank (<https://taiwanview.twbiobank.org.tw/index>, Oct 2018; n=1,517 Taiwanese controls<sup>9</sup>) and the Human Genetic Variation Database (HGVD, <http://www.hgvd.genome.med.kyoto-u.ac.jp/index.html>, July 2019; n=1,208 Japanese controls<sup>10</sup>). AF of *TNNI3*:p.R79C was also retrieved from the CONVERGE dataset representing 11,670 female Han Chinese controls across 24 provinces of China but not *TNNT2*:p.R286H which was not included in the CONVERGE study<sup>11</sup>.

### ***Genetic variation between HCM and controls***

Protein-altering variants (annotated as predicted missense, nonsense, frameshift, inframe indels and essential splice site) in designated canonical transcripts with high quality score (PASS) were studied (Table S1). Globally rare variants, defined by a gnomAD global minor allele frequency (MAF)  $<0.0001$  (based on the reasoning from Walsh et al<sup>4</sup>), were included in analysis, taking this threshold to define an inclusive variant set to take forward for further annotation and review. As the disease architecture of HCM in Singaporean predominantly Chinese is not well-characterised, low frequency variants as defined by a gnomAD global MAF  $<0.001$  were assessed for possible enrichment in the local index HCM patients compared to gnomAD population controls using Fisher's Exact test and manually curated using ACMG/AMP guidelines in the study (Table S2). The case excess (likely contribution of variants in a gene to disease) was estimated by combining the proportion of pathogenic and likely pathogenic (P/LP) variants along with the excess of VUS (exVUS) in index cases compared with the population background as previously described<sup>2</sup>. Fisher's exact test with Bonferroni correction ( $n=15$  genes,  $P<0.0033$ ) was used to test an association between rare variant prevalence and disease status. Odds ratio (OR) and etiological fraction (EF) with 95% confidence intervals (CI) were calculated as previously described<sup>12, 13</sup>.

### ***Penetrance estimation***

The population penetrance of each disease variant (*TNNI3*:p.R79C and *TNNT2*:p.R286H) was estimated as described previously (<https://www.cardiodb.org/allelefrequencyapp/>)<sup>14</sup>, using prevalence of the disease equals 1 in 500, allelic frequency of the variants among HCM patients and population reference controls retrieved from ethnicity specific databases. Additionally, the penetrance in family members was estimated by calculating the proportion of genotype positive relatives found to manifest disease. Index cases were not included in the calculation, whether ascertained as cases or controls. Briefly, first degree relatives of the index Singaporean HCM patients and Singaporean controls with *TNNI3*:p.R79C or *TNNT2*:p.R286H variants were invited to participate in family studies on a research basis by the presence of *TNNI3*:p.R79C or *TNNT2*:p.R286H and a phenotype meeting HCM criteria. In the Singaporean HCM cohort where the probands are clinically diagnosed with HCM, 2 families with *TNNI3*:p.R79C and 3 families with *TNNT2*:p.R286H agreed to participate. Similarly, in the Singaporean control cohort where the index controls did not have HCM, 3 families with *TNNI3*:p.R79C and 2 families with *TNNT2*:p.R286H were recruited. All subjects were assessed using CMR imaging or echocardiography in combination with evaluation of HCM gene variation using TruSight Cardio panel similar to Singaporean HCM patients.

### ***Genotyping and haplotype analysis***

A subset of Singaporean HCM (n = 114) and controls (n = 596) were genotyped using Illumina Infinium OmniExpress-24 kit version 1.1 to assess for evidence of population stratification. Additionally, to investigate the origin of thin filament encoding variants (*TNNI3*:p.R79C and *TNNT2*:p.R286H), carriers with these variants (including Singaporean HCM patients, controls and family members who participated in family

studies) were genotyped using Illumina Infinium OmniExpress-24 kit version 1.1 or 1.2 according to the manufacturer's protocols. Genotype clustering was performed using Illumina Genome Studio 2.0 software and low-quality samples with overall call rate of <0.99 were repeated. Principal-component analysis (PCA) was performed to measure the degree of genetic stratification and population substructure from different ethnicities as previously described<sup>15-17</sup>. Principal-component plots were generated using the GraphPad PRISM version 7.04 software (California, US).

#### ***Cardiac magnetic resonance (CMR) and echocardiography imaging.***

Participants including all Singaporean HCM patients, family members and a subset of Singaporean Chinese controls (n=492/1,000, 49%) recruited from year 2014 to 2016 were investigated using CMR or echocardiography imaging. Participants underwent cine balanced steady-state free precession (b-SSFP) CMR imaging on at 1.5T (Aera, Siemens, Erlangen, Germany) or 3T (Ingenia, Philips, Best, Netherlands). Analysis of the CMR scans was carried out by experienced cardiologists, blinded to genotyping data, using commercially available semi-automated software (CMR42 software, Circle Cardiovascular Imaging, Alberta, Canada) and standardized protocols. The diagnostic criterion of HCM in Singaporean HCM patients and family members was defined as having a maximum left ventricular wall thickness of  $\geq 13$  mm (local clinical criteria) by CMR or echocardiography.

#### ***Engineering of TNNT2:p.R286H variant by CRISPR Cas9 into isogenic human iPSC***

*TNNT2*:p.R286H was engineered into isogenic human iPSCs containing GFP-tag on the amino terminus of titin. GFP-TTN iPSCs were nucleofected using CRISPR/Cas9 and a 20-basepair guide (5'-CCGCGACCTTTATCTCGGAC-3') targeting the *TNNT2* gene as previously described<sup>18</sup>. Isolated subclones were purified and sequenced by Sanger sequencing and MiSeq (>500 reads) to confirm a heterozygous base substitution, G>A, in the 12<sup>th</sup> codon of *TNNT2* exon 16, which encodes *TNNT2*:p.R286H (Figure S5). An established heterozygous pathogenic HCM variant (*MYH7*:p.R403Q) was engineered similarly as positive control<sup>19</sup>.

#### ***Assessment of sarcomere function in iPSC-CMs***

Cardiomyocytes were differentiated from induced pluripotent stem cells (iPSC-CMs) for engineered lines and isogenic controls as described<sup>20</sup>. GFP-tagged iPSC-CMs were re-plated into 12-well plates containing 1:100 Matrigel (Corning) in RPMI 1640 medium at day 14 post-differentiation. Two days later cells were returned to RPMI containing B27 with insulin, and media changed every two days. Imaging was performed at day 30 post-differentiation of iPSC-CMs using SarcTrack as described<sup>21</sup>.

#### ***Seahorse assay***

iPSC-CMs ( $12 \times 10^4$  cells) were seeded onto a Matrigel-coated XF96 plate and studied using a Seahorse XF96 Analyzer (Agilent Technologies, Waldbronn, Germany). The Cell Mito Stress Kit was used to measure cellular oxygen consumption rate (OCR) and extracellular acidification

rate (ECAR) according to the manufacturer's instructions. Cells were washed with prewarmed XF media (non-buffered DMEM supplemented with 2 mM sodium pyruvate, 4mM L-glutamine and 10 mM glucose, pH 7.4) and incubated at 37 °C for 60 min without CO<sub>2</sub>. Basal levels of OCR and ECAR were measured, followed by addition of 2 μM of oligomycin, 2 μM FCCP, 0.5 μM rotenone/0.5 μM antimycin A in a mitochondrial stress test. After the assay, cells were lysed with RIPA buffer and protein content was measured by BCA Assay (Pierce). Data were analyzed by WAVE software (Agilent).

#### *iPSC-CM size assessment*

Cell sizes were assessed after incubation with media containing 5μg/ml Wheat Germ Agglutinin, Alexa Fluor™ 568 (ThermoFisher Scientific) for 10 minutes at 37°C. After washing, samples were imaged using Nikon Ti Eclipse epifluorescence microscope and ≥10 images acquired from 10 regions for analyses using MATLAB program (The MathWorks, Natick, MA) that quantified pixel intensity units between fluorescent cells and the dark background. Data presented are from three separate differentiations, including > 400 cells per genotype. The mean and SEM were assessed and significance was measured by Student's t-test with a significance cut-off of p<0.05.

#### *Statistical analysis*

GraphPad PRISM version 7.04 software was used to perform Fisher's exact test with Bonferroni correction for multiple testing (n=15 genes, p<0.0033), pairwise correlation, parametric Student *t* test, one-way ANOVA or non-parametric Mann-Whitney U test and Kruskal-Walles test

depending on the normality of the data as assessed using Shapiro-Wilk test. Data is reported as means  $\pm$  standard deviation or median (interquartile range) unless otherwise stated. Multivariate linear regression was performed using R version 3.6.0 (Boston, Massachusetts) to investigate the association between genotype and cardiac indices. Healthy Singaporean Chinese carriers of *TNNI3*:p.R79C (n=10) or *TNNT2*:p.R286H (n=8) genotypes and non-carriers (n=482) were included in the analysis. Models were adjusted for known clinical covariates (age, gender and systolic blood pressure) and significance was calculated using ANOVA. Statistical significance was taken with or without multiple comparison corrections and a significance cut-off of  $p < 0.05$ .

#### ***Data Availability***

All supporting data are available either within the article and the Data Supplement or will be available on a reasonable request to the corresponding author due to privacy issue and national laws under the provision that data may not leave the hospital/center premises.



## **REFERENCES:**

1. Bylstra Y, Kuan JL, Lim WK, Bhalshankar JD, Teo JX, Davila S, Teh BT, Rozen S, Tan EC, Liew WKM, *et al.* Population genomics in South East Asia captures unexpectedly high carrier frequency for treatable inherited disorders. *Genet Med.* 2019;21:207-212.
2. Walsh R, Thomson KL, Ware JS, Funke BH, Woodley J, McGuire KJ, Mazzarotto F, Blair E, Seller A, Taylor JC, *et al.* Reassessment of Mendelian gene pathogenicity using 7,855 cardiomyopathy cases and 60,706 reference samples. *Genet Med.* 2017;19:192-203.
3. Alfares AA, Kelly MA, McDermott G, Funke BH, Lebo MS, Baxter SB, Shen J, McLaughlin HM, Clark EH, Babb LJ, *et al.* Results of clinical genetic testing of 2,912 probands with hypertrophic cardiomyopathy: expanded panels offer limited additional sensitivity. *Genet Med.* 2015;17:880-8.
4. Walsh R, Buchan R, Wilk A, John S, Felkin LE, Thomson KL, Chiaw TH, Loong CCW, Pua CJ, Raphael C, *et al.* Defining the genetic architecture of hypertrophic cardiomyopathy: re-evaluating the role of non-sarcomeric genes. *Eur Heart J.* 2017;38:3461-3468.
5. Pua CJ, Bhalshankar J, Miao K, Walsh R, John S, Lim SQ, Chow K, Buchan R, Soh BY, Lio PM, *et al.* Development of a Comprehensive Sequencing Assay for Inherited Cardiac Condition Genes. *J Cardiovasc Transl Res.* 2016;9:3-11.
6. Ingles J, Goldstein J, Thaxton C, Caleshu C, Corty EW, Crowley SB, Dougherty K, Harrison SM, McGlaughon J, Milko LV, *et al.* Evaluating the Clinical Validity of Hypertrophic Cardiomyopathy Genes. *Circ Genom Precis Med.* 2019;12:e002460.
7. Whiffin N, Walsh R, Govind R, Edwards M, Ahmad M, Zhang X, Tayal U, Buchan R, Midwinter W, Wilk AE, *et al.* CardioClassifier: disease- and gene-specific computational decision support for clinical genome interpretation. *Genet Med.* 2018.

8. Karczewski KJ, Francioli LC, Tiao G, Cummings BB, Alföldi J, Wang Q, Collins RL, Laricchia KM, Ganna A, Birnbaum DP, *et al.* Variation across 141,456 human exomes and genomes reveals the spectrum of loss-of-function intolerance across human protein-coding genes. *bioRxiv.* 2019:531210.
9. Chen CH, Yang JH, Chiang CWK, Hsiung CN, Wu PE, Chang LC, Chu HW, Chang J, Song IW, Yang SL, *et al.* Population structure of Han Chinese in the modern Taiwanese population based on 10,000 participants in the Taiwan Biobank project. *Hum Mol Genet.* 2016;25:5321-5331.
10. Higasa K, Miyake N, Yoshimura J, Okamura K, Niihori T, Saitsu H, Doi K, Shimizu M, Nakabayashi K, Aoki Y, *et al.* Human genetic variation database, a reference database of genetic variations in the Japanese population. *J Hum Genet.* 2016;61:547-53.
11. Cai N, Bigdeli TB, Kretzschmar WW, Li Y, Liang J, Hu J, Peterson RE, Bacanu S, Webb BT, Riley B, *et al.* 11,670 whole-genome sequences representative of the Han Chinese population from the CONVERGE project. *Sci Data.* 2017;4:170011.
12. Cole P and MacMahon B. Attributable risk percent in case-control studies. *Br J Prev Soc Med.* 1971;25:242-4.
13. Robins JM and Greenland S. Estimability and estimation of excess and etiologic fractions. *Stat Med.* 1989;8:845-59.
14. Minikel EV, Vallabh SM, Lek M, Estrada K, Samocha KE, Sathirapongsasuti JF, McLean CY, Tung JY, Yu LP, Gambetti P, *et al.* Quantifying prion disease penetrance using large population control cohorts. *Sci Transl Med.* 2016;8:322ra9.
15. Raychaudhuri S, Iartchouk O, Chin K, Tan PL, Tai AK, Ripke S, Gowrisankar S, Vemuri S, Montgomery K, Yu Y, *et al.* A rare penetrant mutation in CFH confers high risk of age-related macular degeneration. *Nat Genet.* 2011;43:1232-6.
16. Aung T, Ozaki M, Lee MC, Schlotzer-Schrehardt U, Thorleifsson G, Mizoguchi T, Igo RP, Jr., Haripriya A, Williams SE, Astakhov YS, *et al.* Genetic association study of exfoliation syndrome identifies a protective rare variant at LOXL1 and five new susceptibility loci. *Nat Genet.* 2017;49:993-1004.

17. Jin SC, Homsy J, Zaidi S, Lu Q, Morton S, DePalma SR, Zeng X, Qi H, Chang W, Sierant MC, *et al.* Contribution of rare inherited and de novo variants in 2,871 congenital heart disease probands. *Nat Genet.* 2017;49:1593-1601.
18. Sharma A, Toepfer CN, Ward T, Wasson L, Agarwal R, Conner DA, Hu JH and Seidman CE. CRISPR/Cas9-Mediated Fluorescent Tagging of Endogenous Proteins in Human Pluripotent Stem Cells. *Curr Protoc Hum Genet.* 2018;96:21.11.1-21.11.20.
19. Toepfer CN, Garfinkel AC, Venturini G, Wakimoto H, Repetti G, Alamo L, Sharma A, Agarwal R, Ewoldt JF, Cloonan P, *et al.* Myosin Sequestration Regulates Sarcomere Function, Cardiomyocyte Energetics, and Metabolism, Informing the Pathogenesis of Hypertrophic Cardiomyopathy. *Circulation.* 2020.
20. Sharma A, Toepfer CN, Schmid M, Garfinkel AC and Seidman CE. Differentiation and Contractile Analysis of GFP-Sarcomere Reporter hiPSC-Cardiomyocytes. *Curr Protoc Hum Genet.* 2018;96:21.12.1-21.12.12.
21. Toepfer CN, Sharma A, Cicconet M, Garfinkel AC, Mucke M, Neyazi M, Willcox JAL, Agarwal R, Schmid M, Rao J, *et al.* SarcTrack. *Circ Res.* 2019;124:1172-1183.
22. Ma N, Zhang JZ, Itzhaki I, Zhang SL, Chen H, Haddad F, Kitani T, Wilson KD, Tian L, Shrestha R, *et al.* Determining the Pathogenicity of a Genomic Variant of Uncertain Significance Using CRISPR/Cas9 and Human-Induced Pluripotent Stem Cells. *Circulation.* 2018;138(23):2666-2681.

## Additional Tables

**Table S1.** Gene and canonical transcripts analysed in Singaporean and UK/US (ACGV) HCM patients.

| Gene          | Gene name                                                    | Ensembl transcript ID | Singaporean HCM Cases | UK/US HCM Cases |
|---------------|--------------------------------------------------------------|-----------------------|-----------------------|-----------------|
| <i>ACTC1</i>  | actin, alpha, cardiac muscle 1                               | ENST00000290378       | 224                   | 4185            |
| <i>CSRP3</i>  | cysteine and glycine-rich protein 3 (cardiac LIM protein)    | ENST00000533783       | 224                   | 2167            |
| <i>FHL1</i>   | four and a half LIM domains 1                                | ENST00000370690       | 224                   | 1535            |
| <i>GLA</i>    | galactosidase, alpha                                         | ENST00000218516       | 224                   | 3700            |
| <i>LAMP2</i>  | lysosomal-associated membrane protein 2                      | ENST00000200639       | 224                   | 3290            |
| <i>MYBPC3</i> | myosin binding protein C, cardiac                            | ENST00000545968       | 224                   | 6179            |
| <i>MYH7</i>   | myosin, heavy chain 7, cardiac muscle, beta                  | ENST00000355349       | 224                   | 6112            |
| <i>MYL2</i>   | myosin, light chain 2, regulatory, cardiac, slow             | ENST00000228841       | 224                   | 4185            |
| <i>MYL3</i>   | myosin, light chain 3, alkali; ventricular, skeletal, slow   | ENST00000395869       | 224                   | 4185            |
| <i>PLN</i>    | phospholamban                                                | ENST00000357525       | 224                   | 2167            |
| <i>PRKAG2</i> | protein kinase, AMP-activated, gamma 2 non-catalytic subunit | ENST00000287878       | 224                   | 3973            |
| <i>TNNC1</i>  | troponin C type 1 (slow)                                     | ENST00000232975       | 224                   | 632             |
| <i>TNNI3</i>  | troponin I type 3 (cardiac)                                  | ENST00000344887       | 224                   | 6047            |
| <i>TNNT2</i>  | troponin T type 2 (cardiac)                                  | ENST00000367318       | 224                   | 6103            |
| <i>TPM1</i>   | tropomyosin 1 (alpha)                                        | ENST00000403994       | 224                   | 4447            |

**Table S2.** Low frequency protein-altering variants as defined by a gnomAD global MAF <0.001 and ≥0.0001 in Singaporean HCM patients.

| Gene           | Ensembl transcript ID | Coding HGVS | Protein HGVS | Disease Allele count | Disease Allele Number | Control Allele Count (gnomAD-EA) | Control Allele Number (gnomAD-EA) | Fisher's Exact p-value* | Classification | Remarks                                                                      |
|----------------|-----------------------|-------------|--------------|----------------------|-----------------------|----------------------------------|-----------------------------------|-------------------------|----------------|------------------------------------------------------------------------------|
| <i>CSRP3</i>   | ENST0000053783        | c.16G>A     | p.Gly6Arg    | 2                    | 448                   | 19                               | 19948                             | 0.1218                  | Likely Benign  |                                                                              |
| <i>MYBP C3</i> | ENST00000545968       | c.1000G>A   | p.Glu334Lys  | 2                    | 448                   | 65                               | 19470                             | 0.6841                  | Likely Benign  |                                                                              |
| <i>MYL3</i>    | ENST00000395869       | c.170C>A    | p.Ala57Asp   | 4                    | 448                   | 11                               | 19952                             | <b>&lt;0.0001</b>       | Likely Benign  | Well-established functional studies show no deleterious effect <sup>22</sup> |
| <i>PRKA G2</i> | ENST00000287878       | c.331C>A    | p.Gln111Lys  | 1                    | 448                   | 35                               | 18378                             | 0.8739                  | Likely Benign  |                                                                              |
| <i>TNNI3</i>   | ENST00000344887       | c.235C>T    | p.Arg79Cys   | 8                    | 448                   | 120                              | 19312                             | <b>0.0062</b>           | VUS            |                                                                              |
| <i>TPM1</i>    | ENST00000403994       | c.845C>G    | p.Thr282Ser  | 1                    | 448                   | 49 <sup>†</sup>                  | 30422 <sup>†</sup>                | 0.7454                  | Likely Benign  |                                                                              |

Protein-altering variants were annotated as missense, nonsense, frameshift, inframe indels and essential splice site with high quality score (PASS). EA, East Asian; HGVS, Human Genome Variation Society; \*Fisher's exact p-value in bold (<0.0083) indicates a significant excess, corrected for multiple testing (n=6); †gnomAD-South Asian (SA) based on the proband's ethnicity<sup>22</sup>Ma N, Zhang JZ, Itzhaki I, Zhang SL, Chen H, Haddad F, Kitani T, Wilson KD, Tian L, Shrestha R, et al. Determining the Pathogenicity of a Genomic Variant of Uncertain Significance Using CRISPR/Cas9 and Human-Induced Pluripotent Stem Cells. *Circulation*. 2018;138(23):2666-2681.

**Table S3.** Singaporean HCM cases with pathogenic, likely pathogenic and VUS variants\* in fifteen core HCM disease genes.

| Gene          | Ensembl transcript ID | Variant (HGVS)         | Variant (Protein)  | Classification    | Allele count |
|---------------|-----------------------|------------------------|--------------------|-------------------|--------------|
| <i>ACTC1</i>  | ENST00000290378       | c.217A>G               | p.I73V             | VUS               | 1            |
| <i>ACTC1</i>  | ENST00000290378       | c.301G>A               | p.E101K            | Likely Pathogenic | 1            |
| <i>CSRP3</i>  | ENST00000533783       | c.271C>G               | p.Q91E             | VUS               | 1            |
| <i>FHL1</i>   | ENST00000370690       | c.613delG              | p.Asp205ThrTer53   | Likely Pathogenic | 1            |
| <i>FHL1</i>   | ENST00000370690       | c.736C>T               | p.H246Y            | VUS               | 1            |
| <i>GLA</i>    | ENST00000218516       | c.644A>G               | p.N215S            | Likely Pathogenic | 1            |
| <i>GLA</i>    | ENST00000218516       | c.899T>C               | p.L300P            | Likely Pathogenic | 1            |
| <i>GLA</i>    | ENST00000218516       | c.1175G>C              | p.R392T            | VUS               | 1            |
| <i>MYBPC3</i> | ENST00000545968       | c.104G>A               | p.R35Q             | VUS               | 1            |
| <i>MYBPC3</i> | ENST00000545968       | c.118G>T               | p.V40L             | VUS               | 1            |
| <i>MYBPC3</i> | ENST00000545968       | c.224_228dupACCAG      | p.Gly77ThrfsTer21  | Likely Pathogenic | 1            |
| <i>MYBPC3</i> | ENST00000545968       | c.329delC              | p.Pro110LeufsTer49 | Likely Pathogenic | 1            |
| <i>MYBPC3</i> | ENST00000545968       | c.659A>G               | p.Y220C            | VUS               | 2            |
| <i>MYBPC3</i> | ENST00000545968       | c.761T>C               | p.L254P            | VUS               | 1            |
| <i>MYBPC3</i> | ENST00000545968       | c.772G>A               | p.E258K            | Pathogenic        | 1            |
| <i>MYBPC3</i> | ENST00000545968       | c.1021_1028delGGCGTCAC | p.G341X            | Likely Pathogenic | 1            |
| <i>MYBPC3</i> | ENST00000545968       | c.1038_1042dupCGGCA    | p.Met348ThrfsTer4  | Pathogenic        | 1            |
| <i>MYBPC3</i> | ENST00000545968       | c.1156G>T              | p.E386X            | Pathogenic        | 1            |
| <i>MYBPC3</i> | ENST00000545968       | c.1279T>C              | p.S427P            | VUS               | 1            |
| <i>MYBPC3</i> | ENST00000545968       | c.1471dupG             | p.Val491GlyfsTer40 | Likely Pathogenic | 1            |
| <i>MYBPC3</i> | ENST00000545968       | c.1639delG             | p.Val547CysfsTer8  | Likely Pathogenic | 1            |
| <i>MYBPC3</i> | ENST00000545968       | c.2336A>G              | p.K779R            | VUS               | 1            |
| <i>MYBPC3</i> | ENST00000545968       | c.2441_2443delAGA      | p.Lys814del        | VUS               | 1            |
| <i>MYBPC3</i> | ENST00000545968       | c.2519T>A              | p.V840E            | VUS               | 1            |
| <i>MYBPC3</i> | ENST00000545968       | c.2543C>T              | p.A848V            | VUS               | 2            |
| <i>MYBPC3</i> | ENST00000545968       | c.2678delC             | p.Pro893GInfsTer31 | Likely Pathogenic | 1            |
| <i>MYBPC3</i> | ENST00000545968       | c.2743G>T              | p.E915X            | Likely Pathogenic | 1            |

|               |                 |                  |                     |                   |   |
|---------------|-----------------|------------------|---------------------|-------------------|---|
| <i>MYBPC3</i> | ENST00000545968 | c.2905+1G>A      | -                   | Pathogenic        | 1 |
| <i>MYBPC3</i> | ENST00000545968 | c.2915G>A        | p.R972Q             | VUS               | 1 |
| <i>MYBPC3</i> | ENST00000545968 | c.3148G>A        | p.E1050K            | VUS               | 1 |
| <i>MYBPC3</i> | ENST00000545968 | c.3179delT       | p.Leu1060ArgfsTer15 | Likely Pathogenic | 1 |
| <i>MYBPC3</i> | ENST00000545968 | c.3215T>G        | p.L1072R            | VUS               | 1 |
| <i>MYBPC3</i> | ENST00000545968 | c.3217dupC       | p.Arg1073ProfsTer4  | Likely Pathogenic | 1 |
| <i>MYBPC3</i> | ENST00000545968 | c.3624delC       | p.Lys1209SerfsTer28 | Pathogenic        | 2 |
| <i>MYBPC3</i> | ENST00000545968 | c.3673G>A        | p.A1225T            | VUS               | 1 |
| <i>MYBPC3</i> | ENST00000545968 | c.3712_3713delCT | p.Leu1238GlyfsTer3  | Pathogenic        | 1 |
| <i>MYBPC3</i> | ENST00000545968 | c.3719T>C        | p.I1240T            | VUS               | 1 |
| <i>MYBPC3</i> | ENST00000545968 | c.3764C>A        | p.A1255D            | VUS               | 1 |
| <i>MYH7</i>   | ENST00000355349 | c.371C>T         | p.T124I             | VUS               | 1 |
| <i>MYH7</i>   | ENST00000355349 | c.427C>T         | p.R143W             | Likely Pathogenic | 3 |
| <i>MYH7</i>   | ENST00000355349 | c.727C>T         | p.R243C             | VUS               | 1 |
| <i>MYH7</i>   | ENST00000355349 | c.985C>T         | p.L329F             | VUS               | 1 |
| <i>MYH7</i>   | ENST00000355349 | c.1324C>T        | p.R442C             | Likely Pathogenic | 1 |
| <i>MYH7</i>   | ENST00000355349 | c.1956G>C        | p.R652S             | VUS               | 2 |
| <i>MYH7</i>   | ENST00000355349 | c.1987C>A        | p.R663S             | Pathogenic        | 1 |
| <i>MYH7</i>   | ENST00000355349 | c.1988G>A        | p.R663H             | Pathogenic        | 1 |
| <i>MYH7</i>   | ENST00000355349 | c.2389G>A        | p.A797T             | Pathogenic        | 1 |
| <i>MYH7</i>   | ENST00000355349 | c.2539A>G        | p.K847E             | Likely Pathogenic | 1 |
| <i>MYH7</i>   | ENST00000355349 | c.3094G>T        | p.D1032Y            | VUS               | 1 |
| <i>MYH7</i>   | ENST00000355349 | c.3133C>T        | p.R1045C            | Likely Pathogenic | 1 |
| <i>MYH7</i>   | ENST00000355349 | c.3134G>A        | p.R1045H            | VUS               | 2 |
| <i>MYH7</i>   | ENST00000355349 | c.3149G>A        | p.R1050Q            | VUS               | 1 |
| <i>MYH7</i>   | ENST00000355349 | c.3200T>C        | p.M1067T            | VUS               | 1 |
| <i>MYH7</i>   | ENST00000355349 | c.3743T>A        | p.M1248K            | VUS               | 1 |
| <i>MYH7</i>   | ENST00000355349 | c.4348G>A        | p.D1450N            | VUS               | 1 |
| <i>MYH7</i>   | ENST00000355349 | c.5134C>T        | p.R1712W            | Likely Pathogenic | 1 |
| <i>MYH7</i>   | ENST00000355349 | c.5240A>G        | p.E1747G            | VUS               | 1 |

|              |                 |           |          |                   |    |
|--------------|-----------------|-----------|----------|-------------------|----|
| <i>MYH7</i>  | ENST00000355349 | c.5704G>C | p.E1902Q | VUS               | 2  |
| <i>MYL2</i>  | ENST00000228841 | c.49G>A   | p.V17M   | VUS               | 1  |
| <i>MYL3</i>  | ENST00000395869 | c.92G>A   | p.R31H   | VUS               | 1  |
| <i>TNNC1</i> | ENST00000232975 | c.65C>A   | p.A22E   | VUS               | 1  |
| <i>TNNC1</i> | ENST00000232975 | c.430A>G  | p.N144D  | VUS               | 3  |
| <i>TNNI3</i> | ENST00000344887 | c.235C>T  | p.R79C   | VUS               | 8  |
| <i>TNNI3</i> | ENST00000344887 | c.307C>T  | p.R103C  | VUS               | 1  |
| <i>TNNI3</i> | ENST00000344887 | c.370G>C  | p.E124Q  | VUS               | 2  |
| <i>TNNI3</i> | ENST00000344887 | c.484C>T  | p.R162W  | Pathogenic        | 2  |
| <i>TNNI3</i> | ENST00000344887 | c.485G>A  | p.R162Q  | Likely Pathogenic | 2  |
| <i>TNNI3</i> | ENST00000344887 | c.532A>G  | p.K178E  | Likely Pathogenic | 1  |
| <i>TNNI3</i> | ENST00000344887 | c.596G>A  | p.S199N  | Likely Pathogenic | 2  |
| <i>TNNT2</i> | ENST00000367318 | c.280C>T  | p.R94C   | Likely Pathogenic | 1  |
| <i>TNNT2</i> | ENST00000367318 | c.388C>T  | p.R130C  | Likely Pathogenic | 2  |
| <i>TNNT2</i> | ENST00000367318 | c.857G>A  | p.R286H  | VUS               | 10 |
| <i>TPM1</i>  | ENST00000403994 | c.82G>C   | p.D28H   | VUS               | 1  |
| <i>TPM1</i>  | ENST00000403994 | c.105G>C  | p.R35S   | VUS               | 2  |
| <i>TPM1</i>  | ENST00000403994 | c.379A>C  | p.M127L  | VUS               | 1  |
| <i>TPM1</i>  | ENST00000403994 | c.635A>T  | p.E212V  | VUS               | 1  |

*HGVS, Human Genome Variation Society; \*Only protein-altering variants (annotated as missense, nonsense, frameshift, inframe indels and essential splice site) with high quality score (PASS) were studied*



**Table S4.** Prevalence of pathogenic, likely pathogenic variants and exVUS in fifteen major HCM genes in Singaporean HCM patients.

| Gene                        | Cases sequenced | SG HCM             |                   |           | gnomAD                               | Fisher's exact p-value <sup>§</sup> | SG HCM exVUS <sup>†</sup> (%) | SG HCM Total Case Excess <sup>‡</sup> (%) |
|-----------------------------|-----------------|--------------------|-------------------|-----------|--------------------------------------|-------------------------------------|-------------------------------|-------------------------------------------|
|                             |                 | P/LP frequency (%) | VUS frequency (%) | Total (%) | Very Rare* control VUS frequency (%) |                                     |                               |                                           |
| <b>Sarcomeric genes</b>     |                 |                    |                   |           |                                      |                                     |                               |                                           |
| <i>MYBPC3</i>               | 224             | 7.1                | 7.6               | 14.7      | 2.6                                  | <b>&lt;0.0001</b>                   | 5.0                           | 12.1                                      |
| <i>MYH7</i>                 | 224             | 4.5                | 6.7               | 11.2      | 2.1                                  | <b>&lt;0.0001</b>                   | 4.6                           | 9.1                                       |
| <i>TNNI3</i>                | 224             | 3.1                | 4.9               | 8.0       | 0.3                                  | <b>&lt;0.0001</b>                   | 4.6                           | 7.7                                       |
| <i>TNNT2</i>                | 224             | 1.3                | 4.5               | 5.8       | 0.4                                  | <b>&lt;0.0001</b>                   | 4.1                           | 5.4                                       |
| <i>TPM1</i>                 | 224             | 0.0                | 2.2               | 2.2       | 0.1                                  | <b>&lt;0.0001</b>                   | 2.1                           | 2.1                                       |
| <i>TNNC1</i>                | 224             | 0.0                | 1.8               | 1.8       | 0.1                                  | <b>0.0001</b>                       | 1.7                           | 1.7                                       |
| <i>ACTC1</i>                | 224             | 0.4                | 0.5               | 0.9       | 0.1                                  | 0.0239                              | 0.4                           | 0.8                                       |
| <i>MYL2</i>                 | 224             | 0.0                | 0.5               | 0.5       | 0.2                                  | 0.4067                              | 0.3                           | 0.3                                       |
| <i>MYL3</i>                 | 224             | 0.0                | 0.5               | 0.5       | 0.4                                  | 0.5447                              | 0.1                           | 0.1                                       |
| <b>Other HCM genes</b>      |                 |                    |                   |           |                                      |                                     |                               |                                           |
| <i>FHL1</i>                 | 224             | 0.4                | 0.5               | 0.9       | 0.2                                  | 0.0820                              | 0.3                           | 0.7                                       |
| <i>CSRP3</i>                | 224             | 0.0                | 0.5               | 0.5       | 0.4                                  | 0.5645                              | 0.1                           | 0.1                                       |
| <i>PLN</i>                  | 224             | 0.0                | 0.0               | 0.0       | 0.0                                  | 1.0000                              | no excess                     | 0.0                                       |
| <b>Pheno/Genocopy genes</b> |                 |                    |                   |           |                                      |                                     |                               |                                           |
| <i>GLA</i>                  | 224             | 0.9                | 0.5               | 1.3       | 0.2                                  | 0.0106                              | 0.3                           | 1.2                                       |
| <i>LAMP2</i>                | 224             | 0.0                | 0.0               | 0.0       | 0.3                                  | 1.0000                              | no excess                     | no excess                                 |
| <i>PRKAG2</i>               | 224             | 0.0                | 0.0               | 0.0       | 0.7                                  | 0.4121                              | no excess                     | no excess                                 |
| Total                       |                 | 17.7               | 30.7              | 48.3      | 8.0                                  | <b>&lt;0.0001</b>                   | 23.7                          | 41.4                                      |

exVUS, excess of variant variants of unknown significance; P, pathogenic; LP, likely pathogenic; SG, Singaporean; \*, MAF<0.0001; †, caseVUS-controlVUS; ‡, P/LP/exVUS variants combined; §, comparison between total SG HCM cases and very rare\* VUS in gnomAD control; Fisher's exact p-value in bold (<0.0033) indicates a significant excess, corrected for multiple testing (n=15)

**Table S5.** Baseline Clinical Characteristics of Singaporean HCM patients with or without pathogenic/likely pathogenic sarcomeric gene variants.

|                                           | Total       | P/LP sarcomeric gene variants | Others      | p-value       |
|-------------------------------------------|-------------|-------------------------------|-------------|---------------|
| <b>Clinical Characteristics</b>           |             |                               |             |               |
| No. of participants                       | 224         | 37                            | 187         | -             |
| Male, % (n)                               | 80 (179)    | 76 (28)                       | 81 (151)    | n/s           |
| Self-reported race, % (n)                 |             |                               |             |               |
| Chinese                                   | 78 (175)    | 92 (34)                       | 75 (141)    | -             |
| Malay                                     | 6 (14)      | 3 (1)                         | 9 (13)      | -             |
| Indian                                    | 11 (24)     | 3 (1)                         | 13 (23)     | -             |
| Others                                    | 5 (11)      | 3 (1)                         | 5 (10)      | -             |
| Mean age at recruitment, years (SD)       | 55.0 (13.4) | 52.4 (14.2)                   | 55.6 (13.3) | n/s           |
| Mean office SBP, mmHg (SD)                | 129 (18)    | 122 (15)                      | 130 (19)    | <b>0.0045</b> |
| Mean office DBP, mmHg (SD)                | 72 (13)     | 71 (13)                       | 73 (12)     | n/s           |
| <b>Cardiac magnetic resonance (CMR)</b>   |             |                               |             |               |
| Individuals with CMR, % (n)               | 56 (125)    | 50 (19)                       | 57 (106)    | -             |
| Mean LV max wall thickness, mm (SD)       | 19.2 (4.2)  | 21.2 (5.9)                    | 18.8 (3.7)  | n/s           |
| Mean LV mass index, g/m <sup>2</sup> (SD) | 92.3 (29.0) | 85.6 (29.2)                   | 93.6 (29.0) | n/s           |
| <b>Echocardiography (Echo)</b>            |             |                               |             |               |
| Individuals with Echo, % (n)              | 44 (99)     | 50 (18)                       | 43 (81)     | -             |
| Mean LV max wall thickness, mm (SD)       | 20.0 (4.9)  | 20.5 (4.4)                    | 19.9 (5.0)  | n/s           |

*P, pathogenic; LP, likely pathogenic; SD, standard deviation; n/s, not significant*

**Table S6.** Clinical Characteristics of Singaporean HCM patients with TNNI3:p.R79C, TNNT2; p.R286H and other TNNI3 or TNNT2 with pathogenic/likely pathogenic variants

|                                           | Singaporean HCM Patients |              |              |               |              | ANOVA<br>p-value |
|-------------------------------------------|--------------------------|--------------|--------------|---------------|--------------|------------------|
|                                           | Total                    | TNNI3:p.R79C | TNNI3 (P/LP) | TNNT2;p.R286H | TNNT2 (P/LP) |                  |
| <b>Clinical Characteristics</b>           |                          |              |              |               |              |                  |
| No. of participants                       | 224                      | 8            | 7            | 10            | 3            | -                |
| Male, % (n)                               | 80 (179)                 | 88 (7)       | 57 (4)       | 70 (7)        | 0            | -                |
| Self-reported race, % (n)                 |                          |              |              |               |              |                  |
| Chinese                                   | 78 (175)                 | 100 (8)      | 100 (7)      | 90 (9)        | 100 (3)      | -                |
| Malay                                     | 6 (14)                   | 0            | 0            | 10 (1)        | 0            | -                |
| Indian                                    | 11 (24)                  | 0            | 0            | 0             | 0            | -                |
| Others                                    | 5 (11)                   | 0            | 0            | 0             | 0            | -                |
| Mean age at recruitment, years (SD)       | 55.0 (13.4)              | 59.1 (12.5)  | 44.0 (18.8)  | 56.5 (10.8)   | 57.7 (21.6)  | n/s              |
| Mean office SBP, mmHg (SD)                | 129 (18)                 | 130 (15)     | 119 (8)      | 117 (24)      | 126 (25)     | n/s              |
| Mean office DBP, mmHg (SD)                | 72 (13)                  | 76 (12)      | 68 (13)      | 64 (11)       | 71 (21)      | n/s              |
| <b>Cardiac magnetic resonance (CMR)</b>   |                          |              |              |               |              |                  |
| Individuals with CMR, % (n)               | 56 (125)                 | 38 (3)       | 86 (6)       | 40 (4)        | 67 (2)       | -                |
| Mean LV max wall thickness, mm (SD)       | 19.2 (4.2)               | 18.0 (4.4)   | 22.3 (7.5)   | 18.3 (2.1)    | 21.5 (0.7)   | n/s              |
| Mean LV mass index, g/m <sup>2</sup> (SD) | 92.3 (29.0)              | 130.1 (77.0) | 79.9 (27.4)  | 90.2 (20.4)   | 94.0 (18.0)  | n/s              |
| <b>Echocardiography (Echo)</b>            |                          |              |              |               |              |                  |
| Individuals with Echo, % (n)              | 44 (99)                  | 62 (5)       | 17 (1)       | 60 (6)        | 33 (1)       | -                |
| Mean LV max wall thickness, mm (SD)       | 20.0 (4.9)               | 19.6 (4.9)   | 25.0 (0)     | 19.0 (4.6)    | 15           | n/s              |

*P, pathogenic; LP, likely pathogenic; LV, left ventricular; SD, standard deviation; n/s, not significant*

**Table S7.** Missense effect prediction by computational algorithms and ClinVar status of *TNNI3*; p.R79C (rs3729712) and *TNNT2*; p.R286H (rs141121678)

| Variants                                  | Missense Effect          |                          | ClinVar |                                                                                                 |                        |                      |
|-------------------------------------------|--------------------------|--------------------------|---------|-------------------------------------------------------------------------------------------------|------------------------|----------------------|
|                                           | Computational Algorithms | Computational Prediction | No      | Study Name                                                                                      | Clinical Significance  | Last Evaluation Date |
| <b><i>TNNI3</i>:p.R79C (rs3729712)</b>    | SIFT                     | Deleterious              | 1       | GeneDx                                                                                          | Likely benign          | Jun 12, 2017         |
|                                           | Polyphen-VAR             | Possibly damaging        | 2       | Stanford Center for Inherited Cardiovascular Disease,Stanford University                        | Likely benign          | Sep 6, 2017          |
|                                           | MutationTaster           | Disease-causing          | 3       | Laboratory for Molecular Medicine,Partners HealthCare Personalized Medicine                     | Benign                 | Nov 22, 2017         |
|                                           | CADD                     | 34                       | 4       | Ambry Genetics                                                                                  | Likely benign          | Dec 7, 2017          |
|                                           |                          |                          | 5       | Molecular Diagnostic Laboratory for Inherited Cardiovascular Disease,Montreal Heart Institute   | Likely benign          | -                    |
|                                           |                          |                          | 6       | Center for Advanced Laboratory Medicine, UC San Diego Health,University of California San Diego | Likely benign          | May 08, 2018         |
|                                           |                          |                          | 7       | Invitae                                                                                         | Likely benign          | Oct 31, 2018         |
|                                           |                          |                          | 8       | Mendelics                                                                                       | Benign                 | May 28, 2019         |
| <b><i>TNNT2</i>:p.R286H (rs141121678)</b> | SIFT                     | Deleterious              | 1       | CSER_CC_NCGL, University of Washington                                                          | Likely pathogenic      | Jun 1, 2014          |
|                                           | Polyphen-VAR             | Probably damaging        | 2       | Stanford Center for Inherited Cardiovascular Disease,Stanford University                        | Uncertain significance | Jan 28, 2016         |

|                |                 |   |                                                                                   |                           |              |
|----------------|-----------------|---|-----------------------------------------------------------------------------------|---------------------------|--------------|
| MutationTaster | Disease-causing | 3 | Blueprint Genetics                                                                | Uncertain<br>significance | Nov 22, 2017 |
| CADD           | 32              | 4 | Ambry Genetics                                                                    | Uncertain<br>significance | Jan 18, 2018 |
|                |                 | 5 | Laboratory for Molecular<br>Medicine,Partners HealthCare<br>Personalized Medicine | Uncertain<br>significance | Jul 16, 2018 |
|                |                 | 6 | GeneDx                                                                            | Uncertain<br>significance | Oct 02, 2018 |
|                |                 | 7 | Invitae                                                                           | Likely pathogenic         | Dec 18, 2018 |

---

*SIFT: <http://sift.jcvi.org>; Polyphen: <http://genetics.bwh.harvard.edu/pph2>; MutationTaster: <http://www.mutationtaster.org>; CADD:*

*<http://cadd.gs.washington.edu/>*

**Table S8.** Baseline MRI Characteristics of Singaporean healthy Chinese carriers and non-carriers of *TNNI3*:p.R79C and *TNNT2*:p.R286H

|                                     | Singaporean Chinese |                       |               |                        |          |
|-------------------------------------|---------------------|-----------------------|---------------|------------------------|----------|
|                                     | Non-carriers        | <i>TNNI3</i> : p.R79C | p-value*      | <i>TNNT2</i> : p.R286H | p-value* |
| <b>Clinical Characteristics</b>     |                     |                       |               |                        |          |
| No. of participants                 | 482                 | 10                    | -             | 8                      | -        |
| Male, % (n)                         | 49 (236)            | 70 (7)                | -             | 50 (4)                 | -        |
| Recruitment methods % (n)           |                     |                       |               |                        |          |
| Population Controls                 | 100 (482)           | 80 (8)                | -             | 33 (2)                 | -        |
| Family members of probands          | 0                   | 20 (2)                | -             | 67 (6)                 | -        |
| Mean age at recruitment, years (SD) | 50.8 (15.5)         | 44.7 (13.4)           | n/s           | 42.0 (15.5)            | n/s      |
| Mean office SBP, mmHg (SD)          | 134 (12)            | 144 (20)              | n/s           | 125 (17)               | n/s      |
| Mean office DBP, mmHg (SD)          | 80 (20)             | 86 (12)               | n/s           | 81 (15)                | n/s      |
| <b>Cardiac magnetic resonance</b>   |                     |                       |               |                        |          |
| LVEF, %                             | 62 (7)              | 60 (4)                | n/s           | 63 (3)                 | n/s      |
| iLVEDV, mL/m <sup>2</sup> (SD)      | 71 (12)             | 76 (9)                | n/s           | 66 (11)                | n/s      |
| iLVESV, mL/m <sup>2</sup> (SD)      | 27 (8)              | 31 (5)                | n/s           | 25 (3)                 | n/s      |
| Maximum LV wall thickness, mm (SD)  | 7.6 (1.4)           | 9.2 (2.1)             | <b>0.0001</b> | 8.0 (1.9)              | n/s      |
| iLVM, g/m <sup>2</sup> (SD)         | 44.1 (9.0)          | 52.1 (9.2)            | <b>0.0219</b> | 42.6 (9.2)             | n/s      |

*iLVEDV*, indexed left ventricular end diastolic volume; *iLVESV*, indexed left ventricular end systolic volume, *iLVM*, indexed left ventricular mass; *LVEF*, left ventricular; *SD*, standard deviation; *n/s*, not significant; \*, comparisons of multivariate linear and regression models adjusted by gender, age and SBP between non-carriers and *TNNI3*:p.R79C or *TNNT2*:p.R286H using ANOVA ; p-value in bold indicates a significance

**Table S9.** Haplotype analysis of *TNNI3*:p.R79C (rs3729712) in unrelated probands from Singaporean HCM and population controls

| Haplotype | Patient ID | Cohort  | rs2288528 | <i>TNNI3</i> :p.R79C (rs3729712) | rs2278281 |
|-----------|------------|---------|-----------|----------------------------------|-----------|
| 1         | 0002       | HCM     | T         | +                                | G         |
| 1         | 0004       | HCM     | T         | +                                | G         |
| 1         | 0022       | HCM     | T         | +                                | G         |
| 1         | 0025       | HCM     | T         | +                                | G         |
| 1         | 0043       | HCM     | T         | +                                | G         |
| 1         | 0000479    | HCM     | T         | +                                | G         |
| 1         | 0000526    | HCM     | T         | +                                | G         |
| 1         | 0000638    | HCM     | T         | +                                | G         |
| 1         | 0001       | Control | T         | +                                | G         |
| 1         | 0009       | Control | T         | +                                | G         |
| 1         | 0013       | Control | T         | +                                | G         |
| 1         | 0048       | Control | T         | +                                | G         |
| 1         | 0055       | Control | T         | +                                | G         |
| 1         | 0057       | Control | T         | +                                | G         |
| 1         | 0048       | Control | T         | +                                | G         |
| 1         | 00481      | Control | T         | +                                | G         |

**Table S10.** Pairwise correlation of genetic markers around *TNNI3*:p.R79C forming a T-A-G haplotype.

| Haplotype                                                         | Actual Frequency | Expected Frequency under Linkage Equilibrium |
|-------------------------------------------------------------------|------------------|----------------------------------------------|
| <i>rs2288528 (chr19:55667500)   TNNI3:p.R79C (chr19:55667616)</i> |                  |                                              |
| <i>(R<sup>2</sup>=0.659)</i>                                      |                  |                                              |
| TA                                                                | 0.267857         | 0.095663                                     |
| AA                                                                | 0.000000         | 0.172194                                     |
| TG                                                                | 0.089286         | 0.261480                                     |
| AG                                                                | 0.642857         | 0.470663                                     |
| <i>TNNI3:p.R79C (chr19:55667616)   rs2278281 (chr19:55668197)</i> |                  |                                              |
| <i>(R<sup>2</sup>=0.671)</i>                                      |                  |                                              |
| AG                                                                | 0.275862         | 0.099881                                     |
| GG                                                                | 0.086207         | 0.262188                                     |
| AT                                                                | 0.000000         | 0.175981                                     |
| GT                                                                | 0.637931         | 0.46195                                      |
| <i>rs2288528 (chr19:55667500)   rs2278281 (chr19:55668197)</i>    |                  |                                              |
| <i>(R<sup>2</sup>=1.000)</i>                                      |                  |                                              |
| TG                                                                | 0.357143         | 0.127551                                     |
| AG                                                                | 0.000000         | 0.229592                                     |
| TT                                                                | 0.000000         | 0.229592                                     |
| AT                                                                | 0.642857         | 0.413265                                     |



**Table S11.** Demographics and minor allele frequency of *TNNI3*, p.R79C (rs3729712) in CONVERGE Study

| Chromosome | Position | Provinces of China | A1 | A2 | MAC | Allele number | MAF    |
|------------|----------|--------------------|----|----|-----|---------------|--------|
| 19         | 55667616 | Anhui              | A  | G  | 0   | 102           | 0.0000 |
| 19         | 55667616 | Beijing            | A  | G  | 1   | 826           | 0.0012 |
| 19         | 55667616 | Chongqing          | A  | G  | 1   | 602           | 0.0017 |
| 19         | 55667616 | Fujian             | A  | G  | 1   | 162           | 0.0062 |
| 19         | 55667616 | Gansu              | A  | G  | 1   | 248           | 0.0040 |
| 19         | 55667616 | Guangdong          | A  | G  | 1   | 1552          | 0.0006 |
| 19         | 55667616 | Guangxi            | A  | G  | 0   | 34            | 0.0000 |
| 19         | 55667616 | Hainan             | A  | G  | 0   | 8             | 0.0000 |
| 19         | 55667616 | Hebei              | A  | G  | 0   | 830           | 0.0000 |
| 19         | 55667616 | Heilongjiang       | A  | G  | 1   | 778           | 0.0013 |
| 19         | 55667616 | Henan              | A  | G  | 0   | 1182          | 0.0000 |
| 19         | 55667616 | Hubei              | A  | G  | 1   | 398           | 0.0025 |
| 19         | 55667616 | Hunan              | A  | G  | 0   | 146           | 0.0000 |
| 19         | 55667616 | Jiangsu            | A  | G  | 4   | 1730          | 0.0023 |
| 19         | 55667616 | Jiangxi            | A  | G  | 2   | 610           | 0.0033 |
| 19         | 55667616 | Jilin              | A  | G  | 0   | 436           | 0.0000 |
| 19         | 55667616 | Liaoning           | A  | G  | 2   | 1768          | 0.0011 |
| 19         | 55667616 | Shaanxi            | A  | G  | 2   | 1648          | 0.0012 |
| 19         | 55667616 | Shandong           | A  | G  | 2   | 1036          | 0.0019 |
| 19         | 55667616 | Shanghai           | A  | G  | 6   | 2992          | 0.0020 |
| 19         | 55667616 | Shanxi             | A  | G  | 2   | 726           | 0.0028 |
| 19         | 55667616 | Sichuan            | A  | G  | 0   | 650           | 0.0000 |
| 19         | 55667616 | Tianjin            | A  | G  | 0   | 402           | 0.0000 |
| 19         | 55667616 | Zhejiang           | A  | G  | 3   | 2362          | 0.0013 |

MAC, minor allele count; MAF, minor allele frequency

## Additional Figures

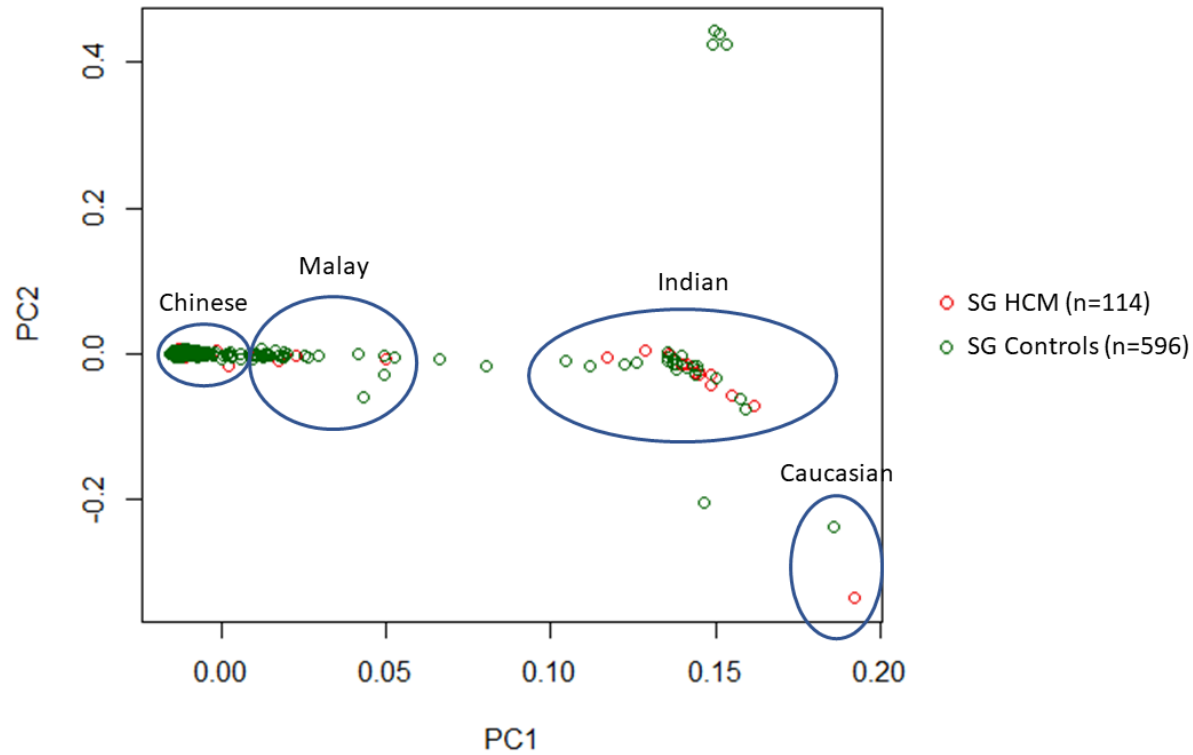

**Figure S1.** Population stratification of Singaporean HCM (red, n = 114) and controls (green, n = 596) using principal component analysis (PCA) showing overlapping clustering between both cohorts.

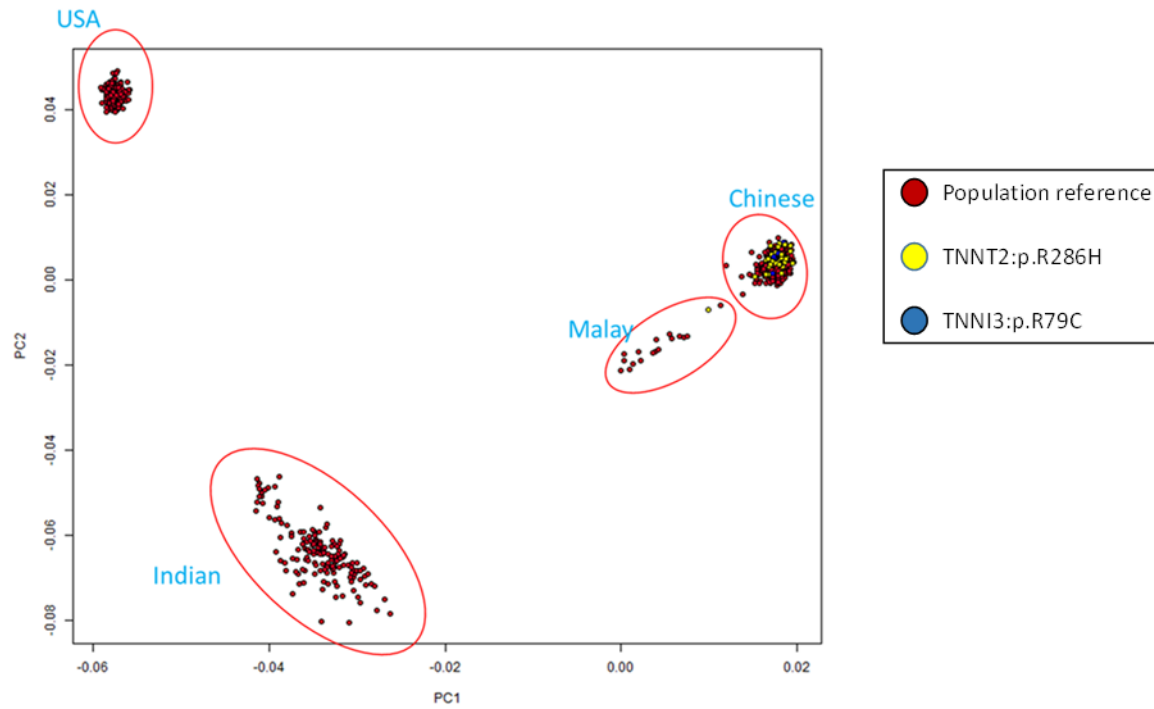

**Figure S2.** Principal component analysis for Singapore carriers of TNNI3:p.R79C (blue) or TNNT2:p.R286H variants (yellow) and control populations (red) representing Chinese, Malay, Indian and USA. All carriers except one were clustered under Chinese controls.



(a)

HCM Family 4

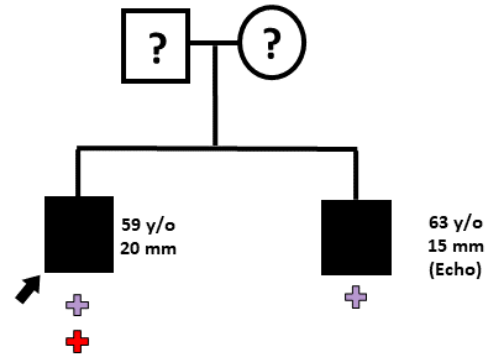

(b)

Control Family 5

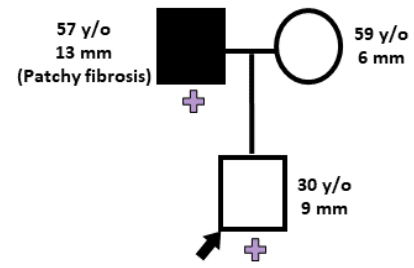

(c)

HCM Family 1

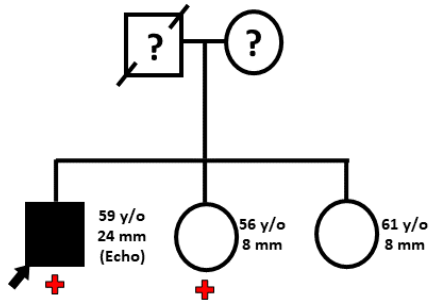

HCM Family 2

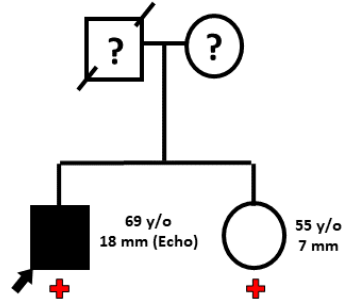

HCM Family 3

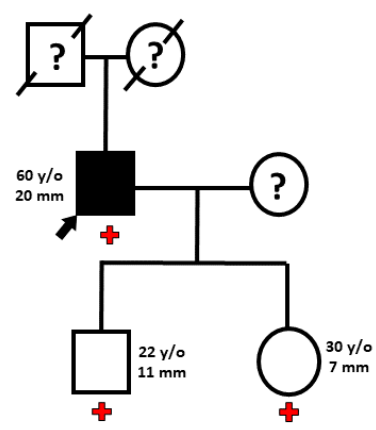

HCM Family 5

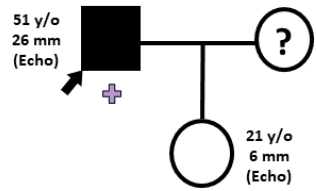

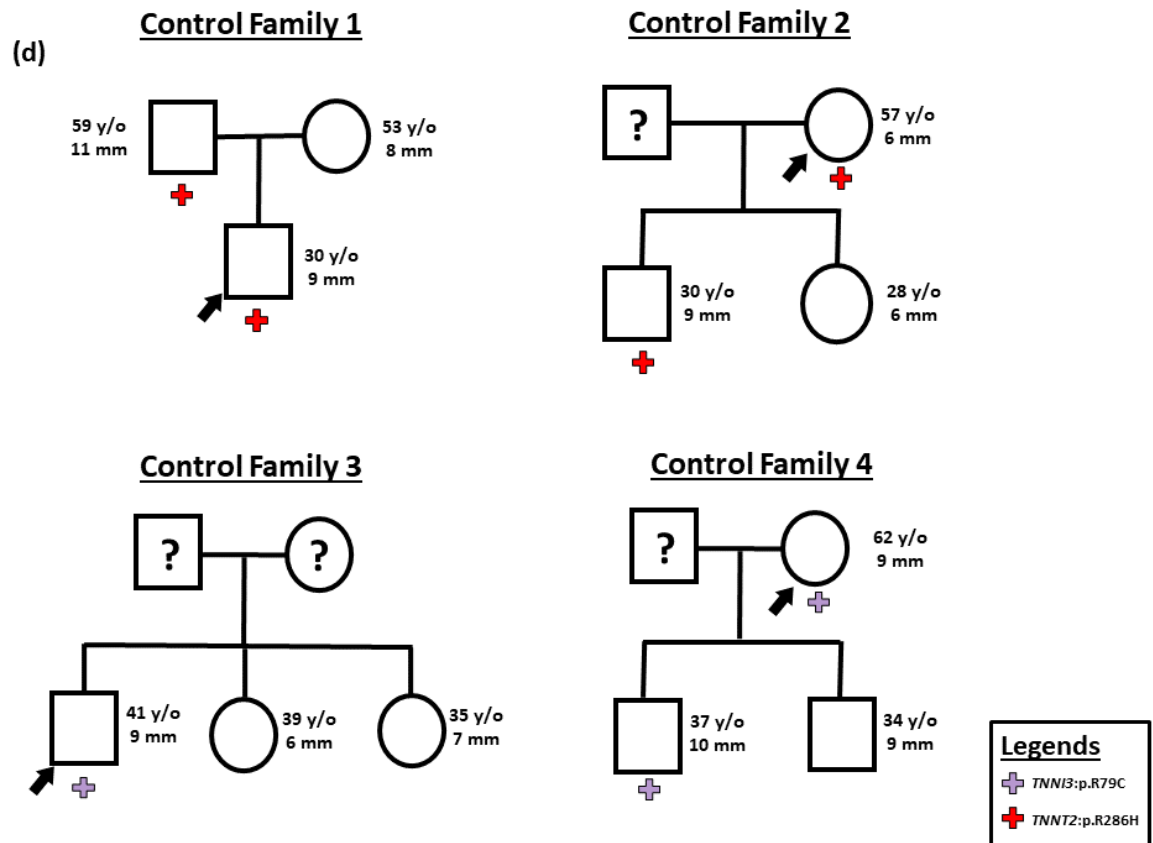

**Figure S3.** Family study of *TNNI3*:p.R79C and *TNNT2*:p.R286H recruited from Singaporean HCM cohort and local control cohort without family history of HCM. **a)** Segregation was observed in the HCM family 4 where the proband was compound heterozygous: *TNNI3*:p.R79C; *TNNT2*:p.R286H and the sibling was heterozygous for *TNNI3*:p.R79C. **b)** Population control Family 5, where the proband was recruited without family history of HCM. The father of proband who also has the *TNNI3*:p.R79C variant was diagnosed with HCM during this study. No left ventricular hypertrophy was observed in the carriers of *TNNI3*:p.R79C or *TNNT2*:p.R286H in the remaining **c)** HCM and **d)** control families.

**Arrows:** proband, **circles:** female, **squares:** male, **darkened:** LVH, **clear:** clinically unaffected, **slashed:** deceased, **interrogation (?):** genetic information was not available, **red plus (+):** *TNNT2*:p.R286H heterogeneous carriers, **purple plus (+):** *TNNI3*:p.R79C heterogeneous carriers.



1

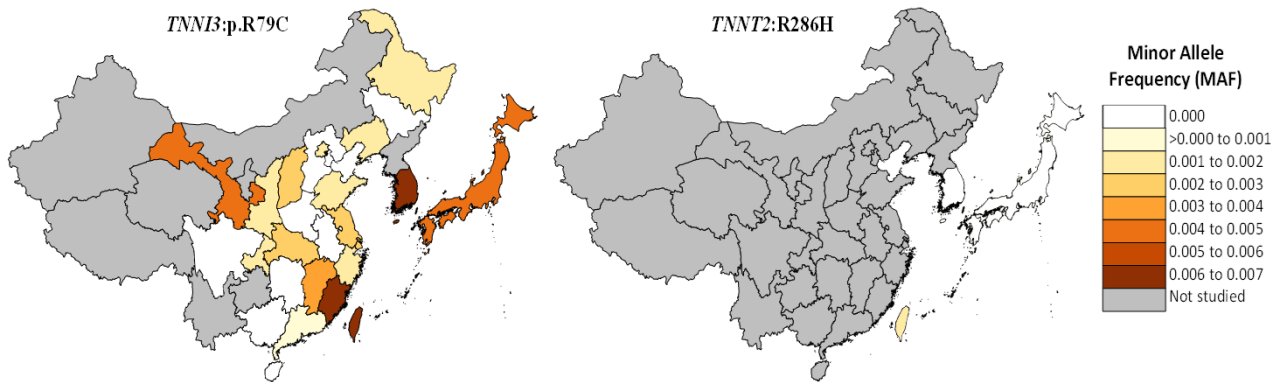

2

3

4 **Figure S4.** Allele Frequency (AF) of TNN3:p.R79C and TNNT2:R286H in different  
5 provinces of China (CONVERGE Study), Taiwan (Taiwan Biobank), South Korea  
6 (gnomAD-EA-Korean) and Japan (Human Genetic Variation Database).  
7

8

9

10

11

12

13

14

15

16

17

18

19

20

21

22

23

24

25  
26  
27  
28  
29  
30  
31  
32  
33  
34  
35  
36  
37  
38  
39  
40  
41  
42

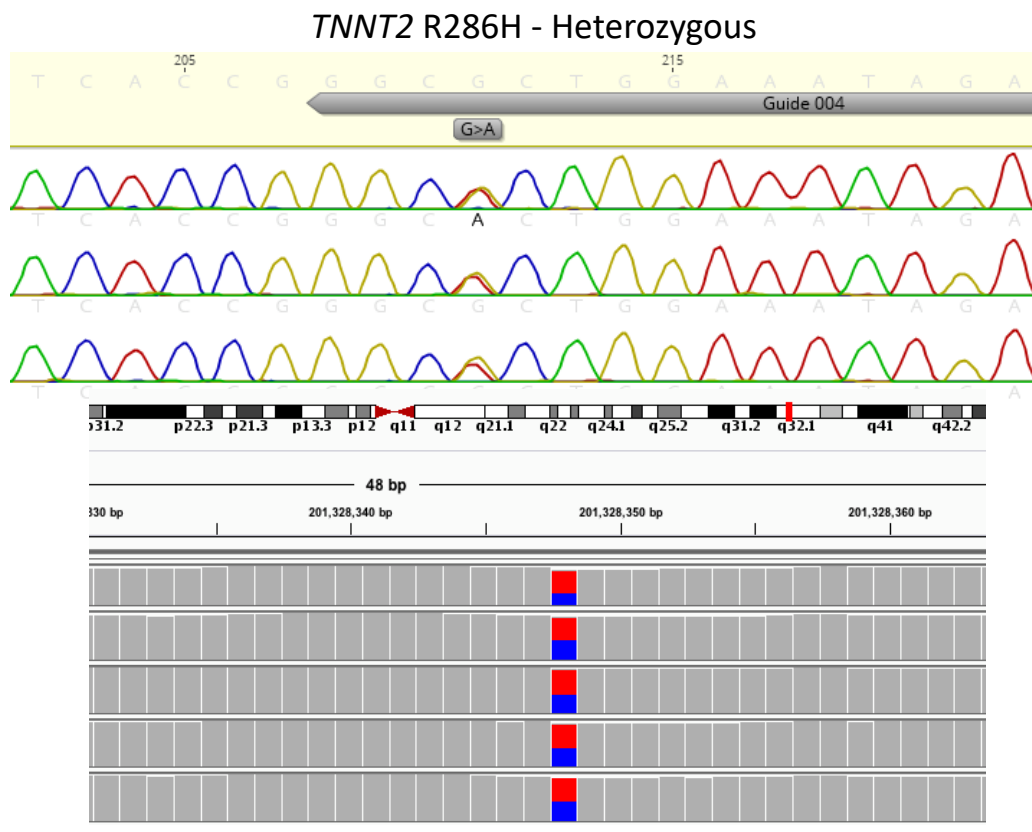

**Figure S5.** Sanger electropherograms of the *TNNT2*:p.R286H clones and heterozygous reads (n = >500 reads) by MiSeq. Both validation methods demonstrate that targeted mutagenesis resulted in a single missense residue from G>A in the 12th codon of *TNNT2* exon 16, which encodes *TNNT2*:p.R286H.
